# Supplementary material
Source: publisher figshare collection journal article supplement (https://f1000.figshare.com/ndownloader/files/1529617)
Supplement: Supplementary file 1 [file 1529617]

HL5	FM	HL5 in HL5:FM	FM in HL5:FM
1.9	3.75	0.83	4.76
2.23	3.16	2.47	8.69
1.61	7.17	1.92	4.11
2.28	7.82	4.64	20.78
3.41	7.98	3.1	20.13
2.65	5.91	1.92	17.56
3.19	5.14	1.34	18.09
2.2			17.79
3.1			21.53
			25.23
			11.12
